# Supplementary material
Source: PubMed Central journal article supplement (PMC4291650)
Supplement: pnas.201414777SI.pdf [file pnas.201414777SI.pdf]

# Supporting Information

Sadowski et al. 10.1073/pnas.1414777111

## SI Text

### Results of the Cluster Analyses

**Cluster Analyses of the Amber Inclusions.** Before cluster analyses were performed, it was tested whether the assumptions for cluster analyses, a metric level of measurement and the absence of outliers, were met. The accuracy of data entry, missing values, skewness, and kurtosis were also examined. Five outliers were excluded (Table S1, numbers 9, 28, 62, 73, and 99).

Due to high correlations between the variables stalk length and gland length ( $r = 0.6$ ), it was decided to run the cluster analysis twice, excluding the length of the glandular head in the first run and without the stalk length in the second run.

The four-cluster solution is supported by the increase of  $\eta^2$  from 0.84 to 0.91 (Table S2). Moreover, the values of  $\eta^2$  do not increase considerably in the subsequent solution. Hence, the addition of more clusters would not improve the results. Regarding the proportional reduction of error (PRE) coefficient, the value for four clusters is low (0.46) and decreases to 0.28 if another cluster is added, indicating minor improvements for the five-cluster solution. However, the value of  $F$ -max is not maximal. The six-cluster solution is supported by the maximal  $F$  value and the low PRE (0.26), but the  $\eta^2$  value does not increase substantially for the solution of six clusters (Table S2).

All in all, the first analysis revealed a clear size pattern for the tentacle morphology: with increasing stalk length the width of the glands, the stalk base width and the tip width rise as well (Table S3).

In the second cluster analysis excluding the stalk length, three- or four-cluster solutions are reasonable (Table S4). The three-cluster solution is supported by the maximal  $F$  value as well as by the strong decrease of PRE from 0.55 to 0.38. The increase of  $\eta^2$  supports the solution of three clusters as well. However, four clusters would be possible, too. The PRE is still very low and  $\eta^2$  relatively high. Moreover, the four-cluster solution also contains the second largest  $F$  value.

As in the first run of the analysis, a size pattern became visible (Table S5), indicating that with longer glands the width of the glands as well as the width of the stalk increased.

**Cluster Analyses of *Roridula gorgonias*.** The cluster analysis was only applied for *Roridula gorgonias*, because the variables of *R. dentata* were correlated too highly (up to  $r = 1$ ). As in the amber inclusions, the assumptions for cluster analyses (metric level of measurement and the absence of outliers) were tested, as well as the accuracy of data entry, missing values, skewness, and kurtosis. Seven outliers were excluded from the analysis (Table S1, numbers 167, 168, 170, 190, 197, 202, and 206).

Similar to the prior analyses of the amber inclusions, correlations between stalk length and width of the stalk base ( $r = 0.85$ ), stalk length and gland width ( $r = 0.80$ ), as well as gland length and gland width ( $r = 0.88$ ) were again quite high. However, the conduction of the cluster analysis was still reasonable, because these correlations did not exceed  $r = 0.9$  and only appeared in three cases. To avoid high correlations and to maintain a good comparability to the cluster analyses of the amber inclusions, the variable gland length was excluded from the first run. As in the amber inclusion, a second cluster analysis was computed, leaving out the stalk length.

The results of the first cluster analysis excluding the gland length (Table S6) revealed two possible solutions: two and five clusters. The solution for two clusters is supported by the PRE value, because it drops strongly from 0.86 to 0.46 and thus indicates that the following cluster solution does not show considerable improvements. However,  $F$ -max is not maximal and the change in  $\eta^2$  from 0.86 to 0.93 is rather small. The maximal  $F$  value is the highest for the 10-cluster solution, but with regards to the content not very feasible.

Another possible solution would be five clusters, because the PRE value is low, followed by another decrease, revealing minor improvements if more clusters are added. In this scenario,  $F$ -max is not maximal but higher than in the three-cluster solution. However,  $\eta^2$  does not change substantially (Table S6).

As for the amber inclusions, the mean values of the size classes show that, with increasing stalk length, the width of the stalk and the glands increase, too (Table S7).

In the second run of the cluster analyses (without the variable stalk length), several solutions were indicated (Table S8). The maximal  $F$  value speaks for two clusters, but in this case, the relatively high PRE and the very low  $\eta^2$  do not support this scenario. The three-cluster solution is indicated by the low PRE, which drops considerably from 0.70 to 0.32. However,  $\eta^2$  does not change substantially and  $F$ -max is not maximal. Another possible solution is a four-cluster scenario, because PRE is low and decreases from 0.31 to 0.19. The following PRE values do not change strongly. The  $F$  value is not maximal but the second largest. The four-cluster solution is also supported by  $\eta^2$ , which increases from 0.79 to 0.86 and does not show any considerable changes afterward.

The mean values of the variables (Table S9) indicate a similar morphological pattern as in the amber inclusion: longer glands are broader, and with increasing gland size, the stalk width at the base and the tip increase as well.

**Statistical Evaluation of the Fossil and *Roridula gorgonias*.** In the first cluster analysis of the amber fossil, the most reasonable solution is the four-cluster result, which is supported by the clear pattern of increasing values in each cluster (Table S3) and by the second run of the analysis without the stalk length, also resulting in four clusters (Tables S4 and S5).

In contrast to the amber inclusions, the most feasible result in the cluster analyses of *Roridula gorgonias* is the five-cluster solution. The two-cluster solution does not appear very likely, because it does not comprise the wide range of the tentacle length from 60 to 3,950  $\mu\text{m}$ .

Although the number of size classes was not the same in the leaf inclusions and *R. gorgonias*, both showed the same pattern of longer tentacles possessing broader stalks and glandular heads. Moreover, it is likely that more size classes were present in the Eocene roridulid plant but are underrepresented in the fossils. In particular, one fossil leaf has a very long tentacle with a ruptured glandular head (Fig. 3A), which was an outlier and hence excluded from the analyses. We see this excluded tentacle as evidence for the additional size class 5.

If the stalk length was excluded from the cluster analyses, the results of the amber fossils and *R. gorgonias* indicated four clusters with the same size pattern: increasing length of the glandular heads is accompanied by rising width of the glandular head and of the tentacle stalk.

**Table S1. Measured data (values in  $\mu\text{m}$ ) from the amber inclusions (group 1) and the leaves of *Roridula gorgonias* (group 2)**

| No. | Group | Stalk length | Stalk base width | Stalk tip width | Gland length | Gland width |
|-----|-------|--------------|------------------|-----------------|--------------|-------------|
| 1   | 1     | 30           | 20               | 10              | 20           | 20          |
| 2   | 1     | 60           | 20               | 10              | 50           | 30          |
| 3   | 1     | 90           | 20               | 10              | 60           | 30          |
| 4   | 1     | 40           | 20               | 10              | 30           | 20          |
| 5   | 1     | 50           | 20               | 10              | 30           | 20          |
| 6   | 1     | 40           | 20               | 10              | 40           | 20          |
| 7   | 1     | 60           | 20               | 10              | 40           | 20          |
| 8   | 1     | 180          | 40               | 10              | 60           | 30          |
| 9   | 1     | 1,430        | 40               | 10              | —            | —           |
| 10  | 1     | 80           | 20               | 10              | 50           | 20          |
| 11  | 1     | 80           | 30               | —               | 50           | 30          |
| 12  | 1     | 80           | 20               | 10              | 60           | 30          |
| 13  | 1     | 80           | 30               | 20              | 70           | 30          |
| 14  | 1     | 60           | 20               | 20              | 50           | 30          |
| 15  | 1     | 60           | 20               | 10              | 40           | 30          |
| 16  | 1     | 220          | 40               | 20              | 80           | 40          |
| 17  | 1     | 70           | 20               | 20              | 50           | 30          |
| 18  | 1     | 200          | 30               | 10              | 120          | 40          |
| 19  | 1     | 70           | 20               | 20              | 60           | 30          |
| 20  | 1     | 40           | 20               | 10              | 30           | 20          |
| 21  | 1     | 150          | 50               | 20              | 80           | 40          |
| 22  | 1     | 90           | 20               | 10              | 60           | 20          |
| 23  | 1     | 60           | 20               | 20              | 50           | 30          |
| 24  | 1     | 170          | 40               | 20              | 100          | 30          |
| 25  | 1     | 60           | 20               | 10              | 40           | 20          |
| 26  | 1     | 70           | 20               | 20              | 50           | 20          |
| 27  | 1     | 110          | 30               | 20              | 70           | 30          |
| 28  | 1     | 350          | 20               | 20              | 110          | 30          |
| 29  | 1     | 70           | 20               | 20              | 50           | 20          |
| 30  | 1     | 70           | 30               | 10              | 60           | 30          |
| 31  | 1     | 200          | 40               | 20              | 80           | 30          |
| 32  | 1     | 90           | 20               | 10              | 50           | 30          |
| 33  | 1     | 40           | 30               | 20              | 40           | 30          |
| 34  | 1     | 90           | 30               | 10              | 50           | 30          |
| 35  | 1     | 130          | 20               | 10              | 50           | 30          |
| 36  | 1     | 150          | 30               | 20              | 70           | 30          |
| 37  | 1     | 300          | 50               | 20              | 120          | 30          |
| 38  | 1     | 60           | 20               | 20              | 50           | 30          |
| 39  | 1     | 250          | 40               | 20              | 100          | 30          |
| 40  | 1     | 40           | 30               | 20              | 40           | 30          |
| 41  | 1     | 60           | 30               | 20              | 60           | 30          |
| 42  | 1     | 50           | 20               | 10              | 50           | 20          |
| 43  | 1     | 130          | 30               | 20              | 110          | 30          |
| 44  | 1     | 200          | 40               | 20              | 70           | 30          |
| 45  | 1     | 80           | 30               | 20              | 60           | 30          |
| 46  | 1     | 100          | 20               | 10              | 60           | 30          |
| 47  | 1     | 250          | 20               | 20              | 110          | 30          |
| 48  | 1     | 120          | 30               | 20              | 90           | 20          |
| 49  | 1     | 140          | 30               | 10              | 90           | 20          |
| 50  | 1     | 60           | 30               | 10              | 80           | 30          |
| 51  | 1     | 140          | 40               | 30              | 60           | 40          |
| 52  | 1     | 90           | 30               | 30              | 70           | 30          |
| 53  | 1     | 110          | 20               | 10              | 50           | 30          |
| 54  | 1     | 40           | 20               | 20              | 40           | 20          |
| 55  | 1     | 120          | 20               | 20              | 60           | 20          |
| 56  | 1     | 70           | 20               | 20              | 60           | 30          |
| 57  | 1     | 200          | 60               | 20              | 100          | 40          |
| 58  | 1     | 30           | 20               | 20              | 40           | 20          |
| 59  | 1     | 100          | 30               | 20              | 110          | 30          |
| 60  | 1     | 120          | 30               | 30              | 50           | 30          |
| 61  | 1     | 50           | 20               | 10              | 30           | 20          |
| 62  | 1     | 300          | 50               | 20              | 60           | 40          |

Table S1. Cont.

| No. | Group | Stalk length | Stalk base width | Stalk tip width | Gland length | Gland width |
|-----|-------|--------------|------------------|-----------------|--------------|-------------|
| 63  | 1     | 300          | 50               | 20              | 60           | 30          |
| 64  | 1     | 50           | 20               | 10              | 40           | 20          |
| 65  | 1     | 120          | 40               | 20              | 50           | 30          |
| 66  | 1     | 100          | 30               | 10              | 60           | 30          |
| 67  | 1     | 190          | 30               | 20              | 80           | 30          |
| 68  | 1     | 40           | 20               | 10              | 30           | 20          |
| 69  | 1     | 100          | 30               | 20              | 50           | 20          |
| 70  | 1     | 140          | 40               | 10              | 70           | 30          |
| 71  | 1     | 110          | 30               | 10              | 30           | 30          |
| 72  | 1     | 250          | 40               | 10              | 60           | 30          |
| 73  | 1     | 110          | 30               | 10              | 120          | 30          |
| 74  | 1     | 110          | 30               | 10              | 70           | 30          |
| 75  | 1     | 90           | 30               | 20              | 30           | 20          |
| 76  | 1     | 40           | 20               | 10              | 30           | 20          |
| 77  | 1     | 50           | 20               | 10              | 30           | 20          |
| 78  | 1     | 30           | 20               | 20              | 30           | 20          |
| 79  | 1     | 200          | 30               | 10              | 70           | 30          |
| 80  | 1     | 170          | 40               | 20              | 80           | 30          |
| 81  | 1     | 50           | 20               | 10              | 30           | 20          |
| 82  | 1     | 40           | 20               | 10              | 30           | 20          |
| 83  | 1     | 40           | 20               | 20              | 20           | 20          |
| 84  | 1     | 40           | 10               | 10              | 20           | 10          |
| 85  | 1     | 40           | 10               | 10              | 30           | 20          |
| 86  | 1     | 150          | 40               | 20              | 80           | 30          |
| 87  | 1     | 50           | 30               | 10              | 30           | 30          |
| 88  | 1     | 100          | 40               | 20              | 50           | 20          |
| 89  | 1     | 280          | 30               | 10              | 60           | 30          |
| 90  | 1     | 270          | 40               | 10              | 50           | 30          |
| 91  | 1     | 20           | 20               | 20              | 20           | 20          |
| 92  | 1     | 50           | 20               | 10              | 40           | 20          |
| 93  | 1     | 30           | 20               | 20              | 30           | 30          |
| 94  | 1     | 80           | 20               | 10              | 60           | 20          |
| 95  | 1     | 60           | 20               | 10              | 40           | 30          |
| 96  | 1     | 40           | 20               | 10              | 30           | 20          |
| 97  | 1     | 140          | 30               | 20              | 50           | 30          |
| 98  | 1     | 150          | 10               | 10              | 50           | 20          |
| 99  | 1     | 50           | 50               | 10              | 50           | 20          |
| 100 | 1     | 160          | 20               | 20              | 60           | 30          |
| 101 | 1     | 120          | 40               | 10              | 50           | 20          |
| 102 | 1     | 30           | 10               | 10              | 40           | 20          |
| 103 | 1     | 110          | 20               | 20              | 50           | 20          |
| 104 | 2     | 2,200        | 120              | 50              | 260          | 120         |
| 105 | 2     | 1,600        | 100              | 40              | 200          | 120         |
| 106 | 2     | 3,000        | 200              | 40              | 220          | 120         |
| 107 | 2     | 2,400        | 120              | 60              | 260          | 120         |
| 108 | 2     | 3,500        | 160              | 60              | 260          | 120         |
| 109 | 2     | 1,400        | 100              | 40              | 200          | 120         |
| 110 | 2     | 2,000        | 100              | 60              | 240          | 120         |
| 111 | 2     | 2,540        | 120              | 40              | 260          | 140         |
| 112 | 2     | 2,500        | 140              | 60              | 240          | 140         |
| 113 | 2     | 2,440        | 140              | 60              | 220          | 120         |
| 114 | 2     | 3,360        | 200              | 60              | 260          | 120         |
| 115 | 2     | 2,000        | 140              | 60              | 240          | 120         |
| 116 | 2     | 3,640        | 180              | 60              | 260          | 120         |
| 117 | 2     | 2,240        | 160              | 60              | 260          | 120         |
| 118 | 2     | 2,300        | 180              | 60              | 240          | 140         |
| 119 | 2     | 1,720        | 120              | 60              | 220          | 120         |
| 120 | 2     | 2,980        | 140              | 60              | 240          | 120         |
| 121 | 2     | 120          | 50               | 30              | 220          | 140         |
| 122 | 2     | 200          | 30               | 30              | 100          | 50          |
| 123 | 2     | 150          | 30               | 30              | 70           | 50          |
| 124 | 2     | 230          | 50               | 30              | 80           | 50          |

Table S1. Cont.

| No. | Group | Stalk length | Stalk base width | Stalk tip width | Gland length | Gland width |
|-----|-------|--------------|------------------|-----------------|--------------|-------------|
| 125 | 2     | 200          | 40               | 30              | 100          | 60          |
| 126 | 2     | 230          | 40               | 30              | 80           | 50          |
| 127 | 2     | 450          | 60               | 30              | 90           | 60          |
| 128 | 2     | 140          | 40               | 30              | 110          | 70          |
| 129 | 2     | 220          | 50               | 40              | 90           | 40          |
| 130 | 2     | 170          | 40               | 30              | 90           | 60          |
| 131 | 2     | 60           | 20               | 15              | 80           | 50          |
| 132 | 2     | 150          | 40               | 30              | 40           | 20          |
| 133 | 2     | 310          | 70               | 40              | 70           | 50          |
| 134 | 2     | 150          | 30               | 40              | 100          | 60          |
| 135 | 2     | 180          | 50               | 30              | 70           | 50          |
| 136 | 2     | 150          | 30               | 30              | 80           | 50          |
| 137 | 2     | 220          | 40               | 30              | 70           | 50          |
| 138 | 2     | 180          | 40               | 30              | 80           | 50          |
| 139 | 2     | 110          | 20               | 20              | 80           | 50          |
| 140 | 2     | 180          | 30               | 30              | 60           | 30          |
| 141 | 2     | 200          | 40               | 30              | 70           | 50          |
| 142 | 2     | 100          | 30               | 20              | 70           | 40          |
| 143 | 2     | 200          | 30               | 30              | 60           | 30          |
| 144 | 2     | 370          | 50               | 30              | 90           | 50          |
| 145 | 2     | 120          | 30               | 20              | 120          | 70          |
| 146 | 2     | 140          | 30               | 30              | 90           | 40          |
| 147 | 2     | 180          | 40               | 30              | 90           | 50          |
| 148 | 2     | 700          | 90               | 40              | 90           | 60          |
| 149 | 2     | 150          | 30               | 20              | 110          | 110         |
| 150 | 2     | 190          | 40               | 30              | 60           | 50          |
| 151 | 2     | 200          | 40               | 30              | 90           | 50          |
| 152 | 2     | 120          | 30               | 30              | 90           | 50          |
| 153 | 2     | 700          | 70               | 50              | 60           | 40          |
| 154 | 2     | 300          | 50               | 40              | 130          | 100         |
| 155 | 2     | 180          | 30               | 20              | 100          | 60          |
| 156 | 2     | 170          | 40               | 30              | 80           | 40          |
| 157 | 2     | 1,050        | 90               | 50              | 70           | 50          |
| 158 | 2     | 440          | 70               | 30              | 120          | 120         |
| 159 | 2     | 230          | 40               | 30              | 110          | 70          |
| 160 | 2     | 570          | 100              | 40              | 80           | 60          |
| 161 | 2     | 200          | 30               | 30              | 120          | 70          |
| 162 | 2     | 250          | 50               | 30              | 70           | 50          |
| 163 | 2     | 170          | 50               | 50              | 100          | 60          |
| 164 | 2     | 180          | 50               | 40              | 100          | 70          |
| 165 | 2     | 300          | 70               | 60              | 90           | 80          |
| 166 | 2     | 550          | 110              | 80              | 150          | 110         |
| 167 | 2     | 160          | 50               | 40              | 220          | 190         |
| 168 | 2     | 490          | 120              | 100             | 80           | 60          |
| 169 | 2     | 120          | 40               | 40              | 200          | 160         |
| 170 | 2     | 600          | 150              | 100             | 100          | 70          |
| 171 | 2     | 240          | 70               | 60              | 200          | 170         |
| 172 | 2     | 550          | 130              | 90              | 120          | 90          |
| 173 | 2     | 280          | 80               | 80              | 230          | 180         |
| 174 | 2     | 550          | 140              | 90              | 130          | 110         |
| 175 | 2     | 150          | 50               | 40              | 210          | 150         |
| 176 | 2     | 450          | 100              | 80              | 90           | 60          |
| 177 | 2     | 150          | 50               | 40              | 180          | 140         |
| 178 | 2     | 150          | 50               | 40              | 80           | 60          |
| 179 | 2     | 600          | 140              | 80              | 100          | 80          |
| 180 | 2     | 250          | 70               | 50              | 200          | 150         |
| 181 | 2     | 200          | 60               | 50              | 120          | 90          |
| 182 | 2     | 140          | 40               | 30              | 100          | 90          |
| 183 | 2     | 130          | 50               | 30              | 70           | 50          |
| 184 | 2     | 100          | 40               | 30              | 60           | 50          |
| 185 | 2     | 120          | 30               | 20              | 80           | 60          |
| 186 | 2     | 150          | 50               | 40              | 70           | 40          |

**Table S1. Cont.**

| No. | Group | Stalk length | Stalk base width | Stalk tip width | Gland length | Gland width |
|-----|-------|--------------|------------------|-----------------|--------------|-------------|
| 187 | 2     | 440          | 100              | 30              | 100          | 60          |
| 188 | 2     | 170          | 50               | 40              | 90           | 60          |
| 189 | 2     | 230          | 80               | 40              | 70           | 60          |
| 190 | 2     | 2,300        | 240              | 50              | 200          | 90          |
| 191 | 2     | 120          | 30               | 20              | 40           | 30          |
| 192 | 2     | 630          | 120              | 30              | 110          | 70          |
| 193 | 2     | 180          | 50               | 30              | 70           | 50          |
| 194 | 2     | 820          | 150              | 40              | 130          | 90          |
| 195 | 2     | 200          | 50               | 40              | 70           | 50          |
| 196 | 2     | 120          | 30               | 20              | 50           | 40          |
| 197 | 2     | 3,950        | 250              | 70              | 250          | 130         |
| 198 | 2     | 220          | 50               | 40              | 70           | 50          |
| 199 | 2     | 800          | 140              | 50              | 130          | 70          |
| 200 | 2     | 230          | 60               | 40              | 80           | 60          |
| 201 | 2     | 420          | 90               | 40              | 100          | 60          |
| 202 | 2     | 2,650        | 250              | 30              | 200          | 90          |
| 203 | 2     | 500          | 90               | 50              | 120          | 80          |
| 204 | 2     | 1,090        | 150              | 50              | 150          | 80          |
| 205 | 2     | 100          | 40               | 20              | 50           | 30          |
| 206 | 2     | 3,050        | 270              | 60              | 290          | 120         |

**Table S2. Results of the first cluster analysis of the leaf inclusions, excluding the gland length, with the three statistical test criteria,  $\eta^2$ , *F*-max, and PRE**

| Cluster | $\eta^2$    | <i>F</i> -max | PRE         |
|---------|-------------|---------------|-------------|
| 1       | 0.00        | -99           | -99         |
| 2       | 0.69        | 215.20        | 0.69        |
| 3       | 0.84        | 243.19        | 0.47        |
| 4       | <b>0.91</b> | 321.93        | <b>0.46</b> |
| 5       | 0.94        | 342.95        | 0.28        |
| 6       | 0.95        | <b>372.49</b> | <b>0.26</b> |
| 7       | 0.96        | 351.62        | 0.12        |
| 8       | 0.96        | 350.62        | 0.14        |
| 9       | 0.97        | 340.66        | 0.11        |
| 10      | 0.97        | 326.11        | 0.08        |

Indicative values are highlighted in bold.

**Table S3. Mean values (in  $\mu\text{m}$ ) of the four-cluster solution for the leaf inclusions**

| Variables        | Size class 1 | Size class 2 | Size class 3 | Size class 4 |
|------------------|--------------|--------------|--------------|--------------|
| Stalk length     | 49.07        | 101.79       | 168.33       | 265.00       |
| Stalk base width | 20.70        | 27.14        | 35.56        | 38.75        |
| Stalk tip width  | 13.95        | 15.71        | 17.22        | 16.25        |
| Gland width      | 23.49        | 26.43        | 31.11        | 31.25        |
| No. of tentacles | 43           | 28           | 18           | 8            |

Length of the glandular head is excluded.

**Table S4. Results of the second cluster analysis of the leaf inclusions, excluding the stalk length, with the three statistical test criteria,  $\eta^2$ ,  $F$ -max, and PRE**

| Cluster | $\eta^2$    | $F$ -max      | PRE         |
|---------|-------------|---------------|-------------|
| 1       | 0.00        | -99           | -99         |
| 2       | 0.55        | 116.81        | 0.55        |
| 3       | <b>0.72</b> | <b>121.61</b> | <b>0.38</b> |
| 4       | <b>0.79</b> | <b>117.90</b> | <b>0.25</b> |
| 5       | 0.82        | 102.09        | 0.12        |
| 6       | 0.83        | 90.92         | 0.09        |
| 7       | 0.85        | 84.27         | 0.09        |
| 8       | 0.86        | 79.12         | 0.08        |
| 9       | 0.87        | 76.20         | 0.09        |
| 10      | 0.88        | 73.81         | 0.08        |

Indicative values are highlighted in bold.

**Table S5. Mean values (in  $\mu\text{m}$ ) of the four-cluster solution for the leaf inclusions**

| Variables        | Size class 1 | Size class 2 | Size class 3 | Size class 4 |
|------------------|--------------|--------------|--------------|--------------|
| Gland length     | 32.00        | 53.16        | 71.58        | 105.00       |
| Gland width      | 21.33        | 26.84        | 31.58        | 30.00        |
| Stalk base width | 20.00        | 24.72        | 26.84        | 36.00        |
| Stalk tip width  | 12.33        | 15.53        | 17.89        | 18.00        |
| No. of tentacles | 30           | 38           | 19           | 10           |

Length of the stalk is excluded.

**Table S6. Results of the first cluster analysis of *Roridula gorgonias*, excluding the gland length, with the three statistical test criteria,  $\eta^2$ ,  $F$ -max, and PRE**

| Cluster | $\eta^2$    | $F$ -max        | PRE         |
|---------|-------------|-----------------|-------------|
| 1       | 0.00        | -99             | -99         |
| 2       | 0.86        | 582.96          | <b>0.86</b> |
| 3       | <b>0.93</b> | 576.90          | 0.46        |
| 4       | 0.96        | 781.77          | 0.49        |
| 5       | 0.98        | 979.70          | <b>0.40</b> |
| 6       | 0.99        | 1,090.73        | 0.28        |
| 7       | 0.99        | 1,202.36        | 0.25        |
| 8       | 0.99        | 1,354.45        | 0.25        |
| 9       | 0.99        | 1,458.88        | 0.20        |
| 10      | 0.99        | <b>1,604.54</b> | 0.20        |

Indicative values are highlighted in bold.

**Table S7. Mean values (in  $\mu\text{m}$ ) of the five-cluster solution for *Roridula gorgonias***

| Variables        | Size class 1 | Size class 2 | Size class 3 | Size class 4 | Size class 5 |
|------------------|--------------|--------------|--------------|--------------|--------------|
| Stalk length     | 181.15       | 628.33       | 1,573.33     | 2,291.11     | 3,296        |
| Stalk base width | 43.61        | 107.78       | 106.67       | 135.56       | 176          |
| Stalk tip width  | 33.52        | 52.78        | 46.67        | 56.67        | 56           |
| Gland width      | 66.23        | 75           | 120          | 126.67       | 120          |
| No. of tentacles | 61           | 18           | 3            | 9            | 5            |

Length of the glandular head is excluded.

**Table S8. Results of the second cluster analysis of *Roridula gorgonias*, excluding the stalk length, with the three statistical test criteria,  $\eta^2$ , *F*-max, and PRE**

| Cluster | $\eta^2$    | <i>F</i> -max | PRE         |
|---------|-------------|---------------|-------------|
| 1       | 0.00        | -99           | -99         |
| 2       | 0.70        | <b>214.85</b> | 0.70        |
| 3       | 0.79        | 178.59        | <b>0.32</b> |
| 4       | <b>0.86</b> | <b>184.43</b> | <b>0.31</b> |
| 5       | 0.88        | 174.15        | 0.19        |
| 6       | 0.91        | 171.12        | 0.18        |
| 7       | 0.92        | 168.48        | 0.15        |
| 8       | 0.93        | 165.33        | 0.13        |
| 9       | 0.94        | 157.11        | 0.08        |
| 10      | 0.94        | 154.96        | 0.10        |

Indicative values are highlighted in bold.

**Table S9. Mean values (in  $\mu\text{m}$ ) of the four-cluster solution for *Roridula gorgonias*, excluding the stalk length**

| Variables        | Size class 1 | Size class 2 | Size class 3 | Size class 4 |
|------------------|--------------|--------------|--------------|--------------|
| Gland length     | 80.37        | 114.44       | 204.44       | 245.33       |
| Gland width      | 52.41        | 81.67        | 147.78       | 124.00       |
| Stalk base width | 42.41        | 105.56       | 67.78        | 148.00       |
| Stalk tip width  | 31.20        | 53.89        | 46.67        | 56.67        |
| No. of tentacles | 54           | 18           | 9            | 15           |
